# Supplementary material for: Stereospecific aziridination of olefins via electrophile-induced cyclization of γ,δ-unsaturated imines and subsequent hydrolytic rearrangement
Source: Royal Society of Chemistry journal article supplement (doi:10.1039/b703147e), 2007-01-01
Supplement: b703147e.pdf [file b703147e.pdf]

## Supporting Information

### Stereospecific Aziridination of Olefins via Electrophile-Induced Cyclization of $\gamma,\delta$ -Unsaturated Imines and Subsequent Hydrolytic Rearrangement

Matthias D'hooghe, Mark Boelens, Johan Piqueur and Norbert De Kimpe\*

*Department of Organic Chemistry, Faculty of Bioscience Engineering, Ghent University,  
Coupure Links 653, B-9000 Ghent, Belgium*

**3-(1-Isopropylaziridin-2-yl)-2,2-dimethylpropanal 8b.**  $^1\text{H}$  NMR (270 MHz,  $\text{CDCl}_3$ ):  $\delta$  1.07-1.14 (12H, m,  $4\times\text{CH}_3$ ); 1.24-1.46 (4H, m,  $\text{NCH}_2\text{CH}(\text{HCH})$ ); 1.87 (1H, dxd,  $J=12.8, 3.6$  Hz,  $(\text{HCH})\text{CMe}_2$ ); 2.38 (1H, m,  $\text{Me}_2\text{CHN}$ ); 9.51 (1H, s,  $\text{HC}=\text{O}$ ).  $^{13}\text{C}$  NMR (20 MHz,  $\text{CDCl}_3$ ):  $\delta$  21.35, 21.90, 22.07 and 22.31 ( $4\times\text{Me}$ ); 33.69 ( $\text{NCH}_2$ ); 34.63 ( $\text{NCH}$ ); 41.43 ( $\text{CH}_2\text{CMe}_2$ ); 45.79 ( $\text{CMe}_2$ ); 61.22 ( $\text{NCHMe}_2$ ); 204.79 ( $\text{HC}=\text{O}$ ). IR (NaCl,  $\text{cm}^{-1}$ ):  $\nu_{\text{C}=\text{O}}=1726$ . MS (70 eV)  $m/z$  (%): 169 ( $\text{M}^+$ , 1); 140 (7); 126 (22); 112 (5); 99 (6); 98 (78); 84 (8); 83 (5); 82 (7); 72 (10); 70 (7); 96 (5); 58 (18); 57 (8); 56 (100); 55 (12). Anal. Calcd for  $\text{C}_{10}\text{H}_{19}\text{NO}$ : C 70.96%; H 11.31%. Found: C 71.19%; H 11.43%.

**3-(1-tert-Butylaziridin-2-yl)-2,2-dimethylpropanal 8c.** Bp. 40-42°C/0.15 mmHg.  $^1\text{H}$  NMR (500 MHz,  $\text{CDCl}_3$ ):  $\delta$  0.93 (9H, s,  $(\text{CH}_3)_3$ ); 1.10 and 1.11 (6H, 2xs,  $(\text{CH}_3)_2\text{C}$ ); 1.23 (1H, d,  $J=3.2$  Hz,  $(H_{\text{trans}}\text{CH})\text{N}$ ); 1.49 (1H, d,  $J=6.1$  Hz,  $(\text{HCH}_{\text{cis}})\text{N}$ ); 1.52 (1H, m,  $\text{CHN}$ ); 1.32 (1H, dxd,  $J=14.2, 7.7$  Hz,  $(\text{HCH})\text{CMe}_2$ ); 1.88 (1H, dxd,  $J=14.2, 4.2$  Hz,  $(\text{HCH})\text{CMe}_2$ ); 9.50 (1H, s,  $\text{HC}=\text{O}$ ).  $^{13}\text{C}$  NMR (20 MHz,  $\text{CDCl}_3$ ):  $\delta$  21.36 and 22.15 ( $(\text{CH}_3)_2\text{C}$ ); 26.66 ( $(\text{CH}_3)_3$ ); 27.32 ( $\text{NCH}_2$ ); 28.01 ( $\text{NCH}$ ); 41.89 ( $\text{CH}_2\text{CMe}_2$ ); 45.68 ( $\text{CMe}_2$ ); 52.79 ( $(\text{CH}_3)_3\text{C}$ ); 204.40 ( $\text{HC}=\text{O}$ ). IR (NaCl,  $\text{cm}^{-1}$ ):  $\nu_{\text{C}=\text{O}}=1725$ . MS (70 eV)  $m/z$  (%): 183 ( $\text{M}^+$ , 11); 168 (11); 140 (14); 127 (17); 126 (13); 112 (11); 108 (11); 98 (22); 96 (22); 84 (33); 83 (11); 82 (25); 81 (11); 71 (36); 70 (28); 69 (11); 67 (14); 58 (33); 57 (56); 56 (90); 55 (33). Anal. Calcd for  $\text{C}_{11}\text{H}_{21}\text{NO}$ : C 72.08%; H 11.55%. Found: C 71.92%; H 11.64%.

**1-(1-*tert*-Butylaziridin-2-ylmethyl)-cyclohexanecarbaldehyde 10.** Bp. 95°C/0.5 mmHg. <sup>1</sup>H NMR (270 MHz, CDCl<sub>3</sub>): δ 0.94 (9H, s, (CH<sub>3</sub>)<sub>3</sub>); 1.22-1.97 (15H, m, (CH<sub>2</sub>)<sub>5</sub>CCH<sub>2</sub>CHCH<sub>2</sub>); 9.50 (1H, s, HC=O). <sup>13</sup>C NMR (68 MHz, CDCl<sub>3</sub>): δ 22.41, 25.73, 27.73, 30.82 and 31.46 ((CH<sub>2</sub>)<sub>5</sub>); 26.63 ((CH<sub>3</sub>)<sub>3</sub>); 27.46 (NCH<sub>2</sub>); 40.50 (CH<sub>2</sub>C); 49.81 (C<sub>quat</sub>); 52.90 ((CH<sub>3</sub>)<sub>3</sub>C); 206.57 (HC=O). IR (NaCl, cm<sup>-1</sup>): ν<sub>C=O</sub>=1719. MS (70 eV) m/z (%): no M<sup>+</sup>, 208 (M<sup>+</sup>-Me, 20); 194 (10); 180 (18); 138 (19); 122 (16); 121 (12); 112 (16); 96 (21); 86 (20); 84 (16); 81 (35); 79 (15); 74 (51); 71 (15); 70 (16); 67 (21); 58 (57); 57 (63); 56 (100); 55 (21). Anal. Calcd for C<sub>14</sub>H<sub>25</sub>NO: C 75.28%; H 11.28%. Found: C 75.39%; H 11.13%.

**3-(1-Isopropyl-3,3-dimethylaziridin-2-yl)-2,2-dimethylpropanal 12.** Bp. 70°C/0.5 mmHg. <sup>1</sup>H NMR (270 MHz, CDCl<sub>3</sub>): δ 1.05 and 1.07 (2×3H, 2×d, J=6.3 Hz, (CH<sub>3</sub>)<sub>2</sub>CH); 1.10 (9H, s, 3×CH<sub>3</sub>); 1.22 (3H, s, CH<sub>3</sub>); 1.25-1.30 (1H, m, CHN); 1.36 (1H, d×d, J=14.5, 9.9 Hz, HCH)CMe<sub>2</sub>); 1.90 (1H, d×d, J=14.5, 2.6 Hz, (HCH)CMe<sub>2</sub>); 2.16 (1H, septet, J=6.3 Hz, NCHMe<sub>2</sub>); 9.49 (1H, s, HC=O). <sup>13</sup>C NMR (68 MHz, CDCl<sub>3</sub>): δ 17.65, 20.74, 21.69, 22.23, 22.46 and 22.91 (6×CH<sub>3</sub>); 36.82 (CH<sub>2</sub>); 40.40 (C<sub>quat</sub>); 44.89 (CHN); 44.96 (C<sub>quat</sub>); 52.49 (NCH); 205.12 (HC=O). IR (NaCl, cm<sup>-1</sup>): ν<sub>C=O</sub>=1721. MS (70 eV) m/z (%): 197 (M<sup>+</sup>, 9); 182 (4); 168 (13); 154 (27); 127 (14); 126 (100); 112 (10); 98 (9); 97 (21); 84 (65); 72 (9); 71 (21); 70 (72); 69 (22); 68 (12); 58 (40); 57 (15); 55 (20). Anal. Calcd for C<sub>12</sub>H<sub>23</sub>NO: C 73.04%; H 11.75%. Found: C 73.14%; H 11.88%.

**3-(1-Isopropyl-2-methylaziridin-2-yl)-2,2-dimethylpropanal 14.** Bp. 65°C/0.03 mmHg. <sup>1</sup>H NMR (270 MHz, CDCl<sub>3</sub>): δ 1.04 and 1.65 (2×1H, 2×s, (HCH)N); 1.06 (3H, s, CH<sub>3</sub>); 1.07 and 1.09 (2×3H, 2×d, J=6.3 Hz, (CH<sub>3</sub>)<sub>2</sub>CH); 1.12 and 1.15 (2×3H, 2×s, 2×CH<sub>3</sub>); 1.51 and 1.96 (2×1H, 2×d, J=14.8 Hz, CH<sub>2</sub>); 2.10 (1H, septet, J=6.3 Hz, NCH); 9.53 (1H, s, HC=O). <sup>13</sup>C NMR (68 MHz, CDCl<sub>3</sub>): δ 15.88, 21.42, 22.69, 23.11 and 23.49 (5×CH<sub>3</sub>); 37.82 (C<sub>quat</sub>); 39.86 (NCH<sub>2</sub>); 46.02 (C<sub>quat</sub>); 49.27 (CH<sub>2</sub>); 52.74 (NCH); 205.60 (HC=O). IR (NaCl, cm<sup>-1</sup>): ν<sub>C=O</sub>=1724. MS (70 eV) m/z (%): no M<sup>+</sup>; 168 (M<sup>+</sup>-Me, 4); 155 (17); 154 (28); 140 (17); 126 (19); 113 (16); 112 (90); 100 (13); 99 (14); 98 (16); 97 (10); 96 (18); 84 (27); 81 (15); 72 (19); 71 (20); 70 (100); 58 (33); 57 (13); 56 (68); 55 (34). Anal. Calcd for C<sub>11</sub>H<sub>21</sub>NO: C 72.08%; H 11.55%. Found: C 72.19%; H 11.67%.

**7-tert-Butyl-2-methyl-7-azabicyclo[4.1.0]heptane-2-carbaldehyde 20.** Bp. 80°C/0.03 mmHg. <sup>1</sup>H NMR (270 MHz, CDCl<sub>3</sub>): δ 0.92 (9H, s, (CH<sub>3</sub>)<sub>3</sub>); 1.11 (3H, s, CH<sub>3</sub>); 0.81-1.89 (7H, m, (CH<sub>2</sub>)<sub>3</sub>CH); 1.59 (1H, d, J=6.3 Hz, NCHCMe); 9.63 (1H, s, HC=O). <sup>13</sup>C NMR (68 MHz, CDCl<sub>3</sub>): δ 16.50, 24.26 and 28.03 ((CH<sub>2</sub>)<sub>3</sub>); 20.90 (Me); 26.61 ((CH<sub>3</sub>)<sub>3</sub>); 29.15 and 35.85 (2×NCH); 43.68 (CMe<sub>2</sub>); 52.63 (CMe<sub>3</sub>); 205.37 (HC=O). IR (NaCl, cm<sup>-1</sup>): ν<sub>C=O</sub>=1716. MS (70 eV) m/z (%): no M<sup>+</sup>; 180 (M<sup>+</sup>-Me, 4); 167 (11); 166 (13); 152 (35); 139 (32); 111 (12); 110 (100); 96 (16); 95 (50); 94 (11); 93 (13); 83 (31); 82 (14); 81 (13); 79 (10); 68 (12); 67 (16); 58 (99); 57 (36); 56 (17); 55 (25); 53 (10). Anal. Calcd for C<sub>12</sub>H<sub>21</sub>NO: C 73.80%; H 10.84%. Found: C 73.96%; H 10.69%.
